# Supplementary material
Source: PubMed Central journal article supplement (PMC7835948)
Supplement: jamaneurol-e205011-s001.pdf [file jamaneurol-e205011-s001.pdf]

## Supplemental Online Content

Martinez S, Yaffe K, Li Y, Byers AL, Peltz CB, Barnes DE. Agent Orange exposure and dementia diagnosis in US veterans of the Vietnam era. *JAMA Neurol*. Published online January 25, 2021. doi:10.1001/jamaneurol.2020.5011

**eTable 1.** Compare included and excluded sample, starting from 2% random sample of Vietnam-era veterans who received VA care from FY2002-FY2015 (total N=511,189).

**eTable 2.** Flow chart showing derivation of the analytic cohort after applying study inclusion and exclusion criteria.

This supplemental material has been provided by the authors to give readers additional information about their work.

**eTable 1.**

**Compare included and excluded sample, starting from 2% random sample of Vietnam-era veterans who received VA care from FY2002-FY2015 (total N=511,189).**

|                                                         | <b>Excluded<br/>(N=194,838)</b> | <b>Included<br/>(N=316,351)</b> | <b>P value</b> |
|---------------------------------------------------------|---------------------------------|---------------------------------|----------------|
| <b>Demographic</b>                                      |                                 |                                 |                |
| Age, y, mean (SD)                                       | 62.62 (7.26)                    | 62.47 (6.65)                    | <.001          |
| Female, n (%)                                           | 5,068 (2.60)                    | 6,462 (2.04)                    | <.001          |
| Race                                                    |                                 |                                 | <.001          |
| Non-Hispanic White                                      | 150,473 (77.23)                 | 240,108 (75.90)                 |                |
| Non-Hispanic Black                                      | 27,472 (14.10)                  | 43,153 (13.64)                  |                |
| Hispanic                                                | 2,450 (1.26)                    | 2,842 (0.90)                    |                |
| American Indian                                         | 862 (0.44)                      | 1,491 (0.47)                    |                |
| Asian                                                   | 967 (0.50)                      | 1,465 (0.46)                    |                |
| Native Hawaiian                                         | 156 (0.08)                      | 2,86 (0.09)                     |                |
| Decline/unknown                                         | 12,458 (6.39)                   | 27,006 (8.54)                   |                |
| >25% college-educated in zip code <sup>a</sup>          | 88,748 (45.55)                  | 142,867 (45.16)                 | <.001          |
| Low tertile (<\$24,632) income in zip code <sup>a</sup> | 50,892 (26.12)                  | 81,130 (25.65)                  |                |
| <b>Medical</b>                                          |                                 |                                 |                |
| Diabetes Mellitus                                       | 16,229 (8.33)                   | 29,569 (9.35)                   | <.001          |
| Hypertension                                            | 32,245 (16.55)                  | 61,574 (19.46)                  | <.001          |
| Myocardial Infarction                                   | 3,500 (1.8)                     | 6,967 (2.20)                    | <.001          |
| Cerebrovascular Disease                                 | 6,312 (3.24)                    | 10,373 (3.28)                   | .442           |
| TBI                                                     | 6,501 (3.34)                    | 6,833 (2.16)                    | <.001          |
| Parkinson's disease                                     | 717 (0.37)                      | 792 (0.25)                      | <.001          |
| <b>Psychiatric</b>                                      |                                 |                                 |                |
| Depression                                              | 17,899 (9.19)                   | 28,711 (9.08)                   | .181           |
| PTSD                                                    | 9,696 (4.98)                    | 12,778 (4.04)                   | <.001          |
| Substance abuse                                         | 8,941 (4.59)                    | 17,649 (5.58)                   | <.001          |
| Tobacco use                                             | 16,265 (8.35)                   | 32,700 (10.34)                  | <.001          |
| Sleep disorder                                          | 4,987 (2.56)                    | 8,181 (2.59)                    | .562           |

Values are N (%) unless otherwise specified. The *P* values are based on unpaired *t* test for age and  $\chi^2$  test for other variables

<sup>a</sup> Education has 60,289 (4.02%) missing values and income has 60,040 (4.00%) missing values.

**eTable 2.**

**Flow chart showing derivation of the analytic cohort after applying study inclusion and exclusion criteria.**

---

|                                  |                                                                                    |
|----------------------------------|------------------------------------------------------------------------------------|
| N = 511,189                      | (2% random sample of Vietnam-era veterans who received VA care from FY2002-FY2015) |
| <i>Exclusion: N = 9,996</i>      | Exclude if dementia diagnosis date before random selection date                    |
| N = 501,193                      |                                                                                    |
| <i>Exclusion: N = 8,480</i>      | Exclude if no follow-up visit                                                      |
| N = 492,713                      |                                                                                    |
| <i>Exclusion: N = 174,897</i>    | Exclude if only met one of the Agent Orange definitions*                           |
| N = 316,819                      |                                                                                    |
| <i>Exclusion: N = 997</i>        | Exclude if age >45 or <110                                                         |
| N = 316,819                      |                                                                                    |
| <i>Exclusion: N = 468</i>        | Exclude unclassified Traumatic Brain Injury                                        |
| N = 316,351 (final study sample) |                                                                                    |

\*AO definition criteria: Two variables were used to define presumptive Agent Orange exposure: 1) patient self-report of Vietnam service with exposure to Agent Orange (inpatient files, all study years) and 2) provider indicator that healthcare encounter was related to Agent Orange exposure (outpatient files, 2002-present; inpatient files: 2005-present).
